# Supplementary material
Source: HighWire-hosted journal article supplement (https://tech.snmjournals.org/highwire/filestream/10511/field_highwire_adjunct_files/0/264218_Supplemental_Data.pdf)

**Supplemental Figure 1.** A. Left to right: Axial Preoperative Fused  $^{18}\text{F}$ -FDG PET-CT, Axial Postoperative  $^{18}\text{F}$ -FDG PET fused with preoperative MRI, Axial Postoperative  $^{18}\text{F}$ -FDG PET-CT B. Left to right: Coronal Preoperative Fused  $^{18}\text{F}$ -FDG PET-CT, Coronal Postoperative  $^{18}\text{F}$ -FDG PET-CT, Postoperative  $^{18}\text{F}$ -FDG PET SSP Right Hemisphere and Right Temporal Lobe and Postoperative  $^{18}\text{F}$ -FDG PET SSP Left Hemisphere and Left Temporal Lobe.

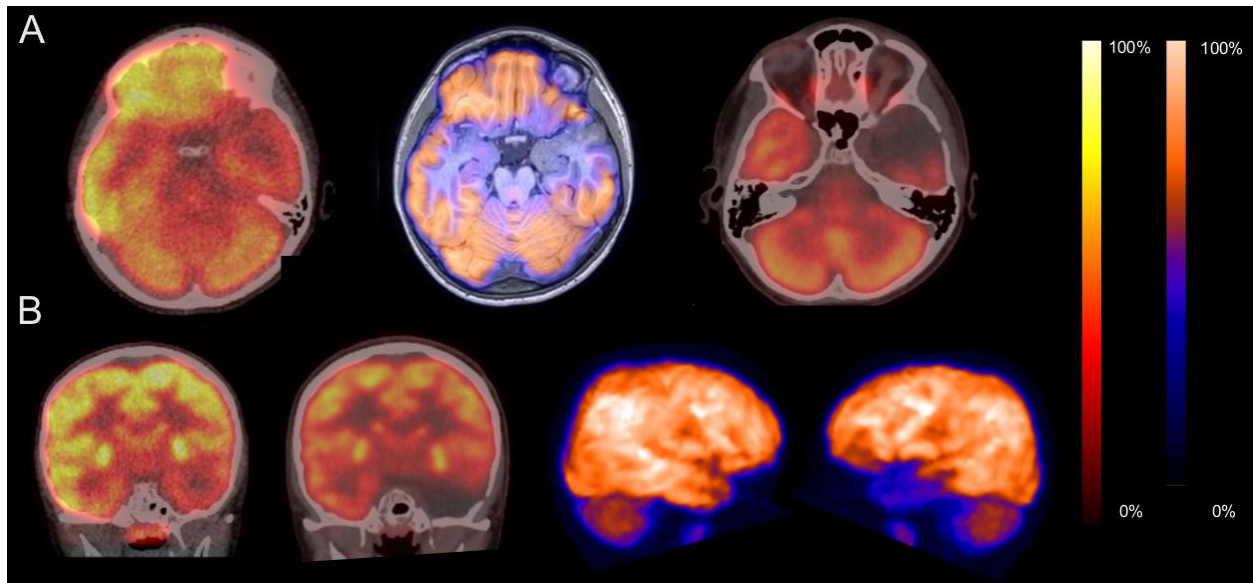

Supplement: 264218_Supplemental_Data.pdf [file 264218_Supplemental_Data.pdf]
